# Supplementary material for: Physiological and molecular analysis of the interaction between aluminium toxicity and drought stress in common bean (Phaseolus vulgaris)
Source: PubMed Central journal article supplement — J Exp Bot. 2012 Feb 27;63(8):3109–25. doi: 10.1093/jxb/ers038 (PMC3350927; doi:10.1093/jxb/ers038), 2012-02-27
Supplement: supp_ers038_00073205-file001.pdf [file supp_ers038_00073205-file001.pdf]

# Physiological and molecular analysis of the interaction between aluminium toxicity and drought stress in common bean (*Phaseolus vulgaris*)

Zhong-Bao Yang<sup>1,2</sup>, Dejene Eticha<sup>2</sup>, Alfonso Albacete<sup>3</sup>, Idupulapati Madhusudana Rao<sup>4</sup>, Thomas Roitsch<sup>3</sup>, Walter Johannes Horst<sup>2\*</sup>

<sup>1</sup>Laboratory of Soil and Plant Molecular Genetics, Jilin University, 5333 Xi'an Road, Changchun 130062, People's Republic of China; <sup>2</sup>Institute of Plant Nutrition, Leibniz Universität Hannover, Herrenhaeuser Str. 2, D-30419 Hannover, Germany; <sup>3</sup>Institute of Plant Science, Karl-Franzens-Universität Graz, Schubertstrasse 51, A-8010 Graz, Austria; <sup>4</sup>International Center for Tropical Agriculture (CIAT), AA 6713, Cali, Colombia

## Supplementary material

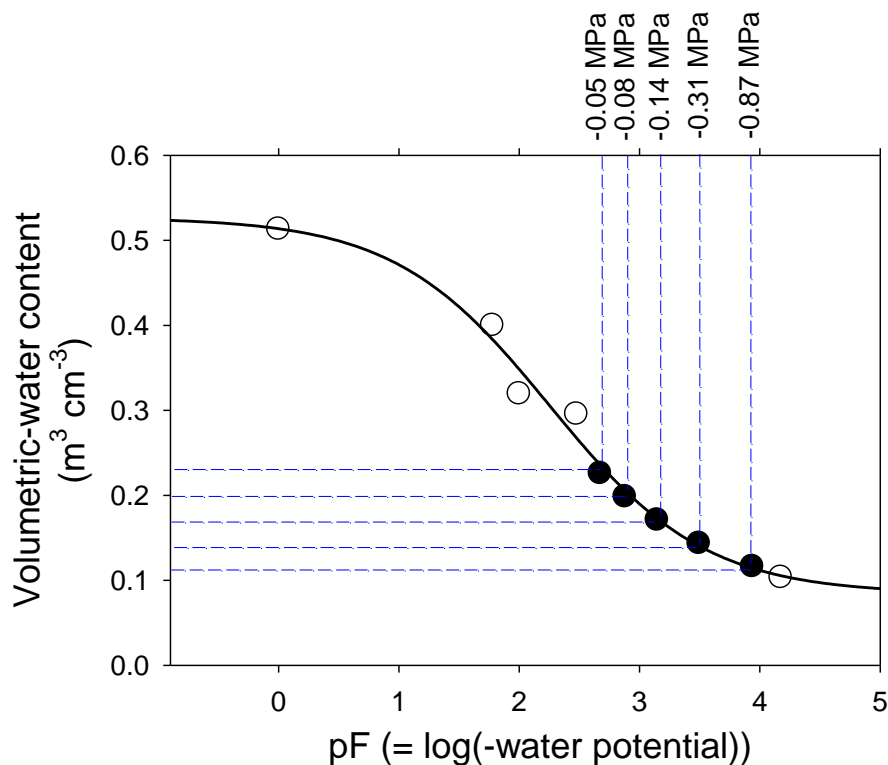

**Fig. S1.** The soil water retention curve of an Oxisol from the Llanos region of Colombia. The filled dots indicate the soil-moisture treatments used in the present study; the corresponding soil-water potentials in MPa are presented on the top of the graph.

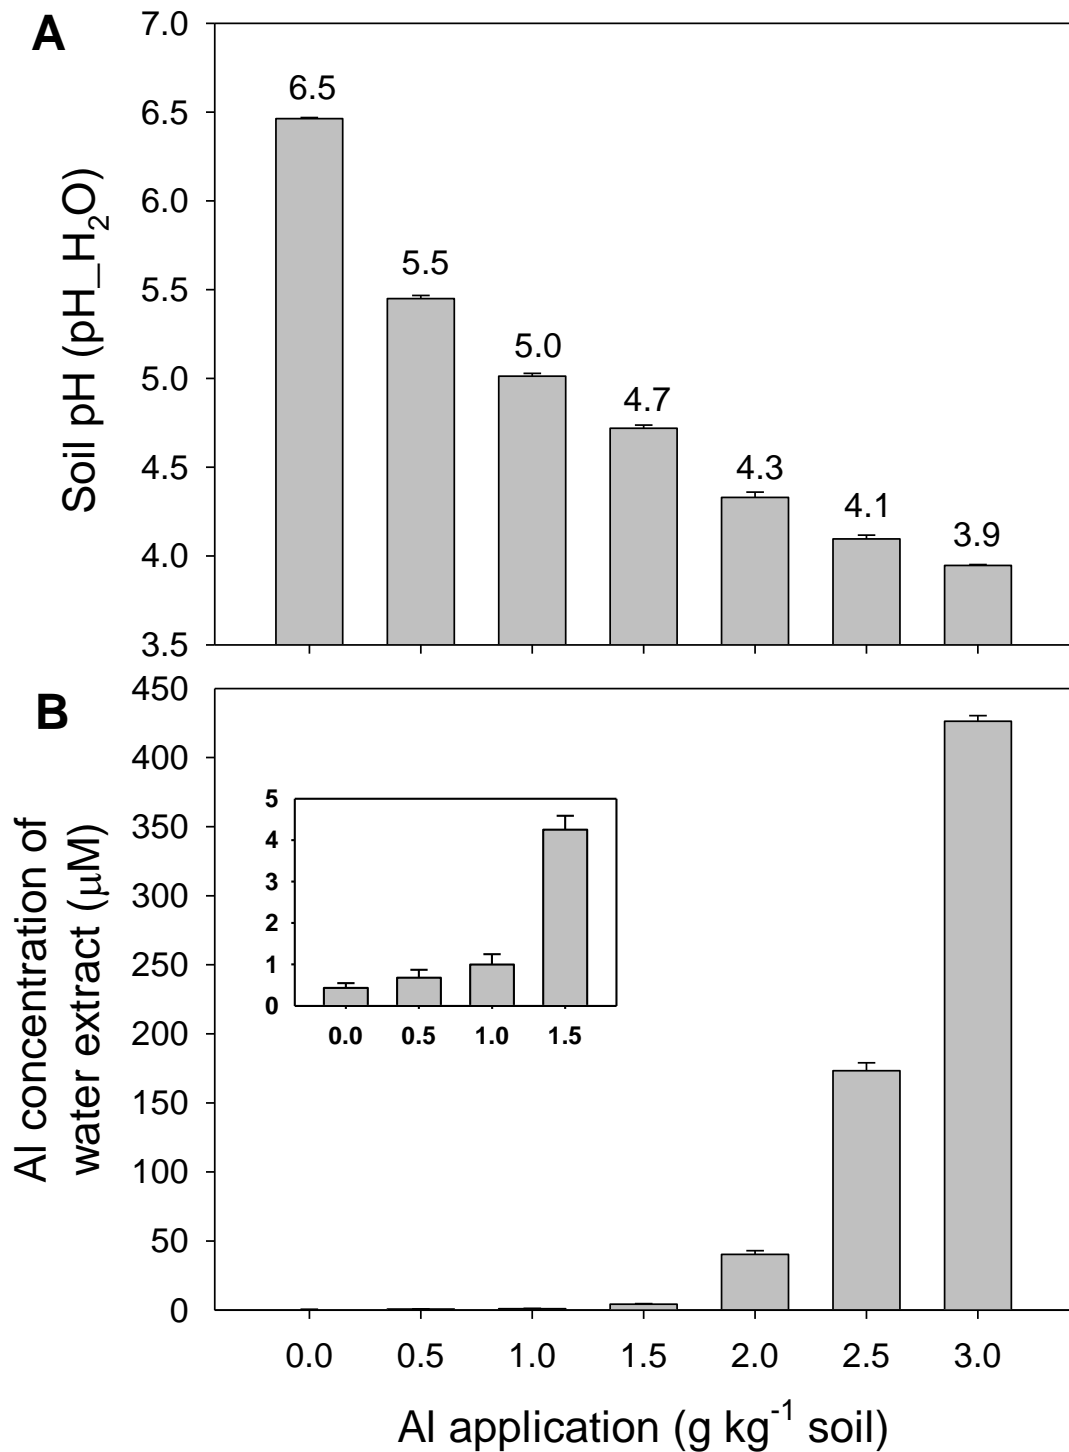

**Fig. S2.** Soil pH (pH<sub>H<sub>2</sub>O</sub>) (A) and the corresponding Al concentrations in the water extracts (B) at different levels of Al application (0 to 3.0 g kg<sup>-1</sup> soil). 10 mg air dried soil was incubated in 20 ml distilled water (pH<sub>H<sub>2</sub>O</sub>), and shaken for 1 h, then the soil pH and Al concentrations were determined. In B, the inserted graph shows the downscaled data for the Al supplies from 0 to 1.5 g kg<sup>-1</sup> soil.

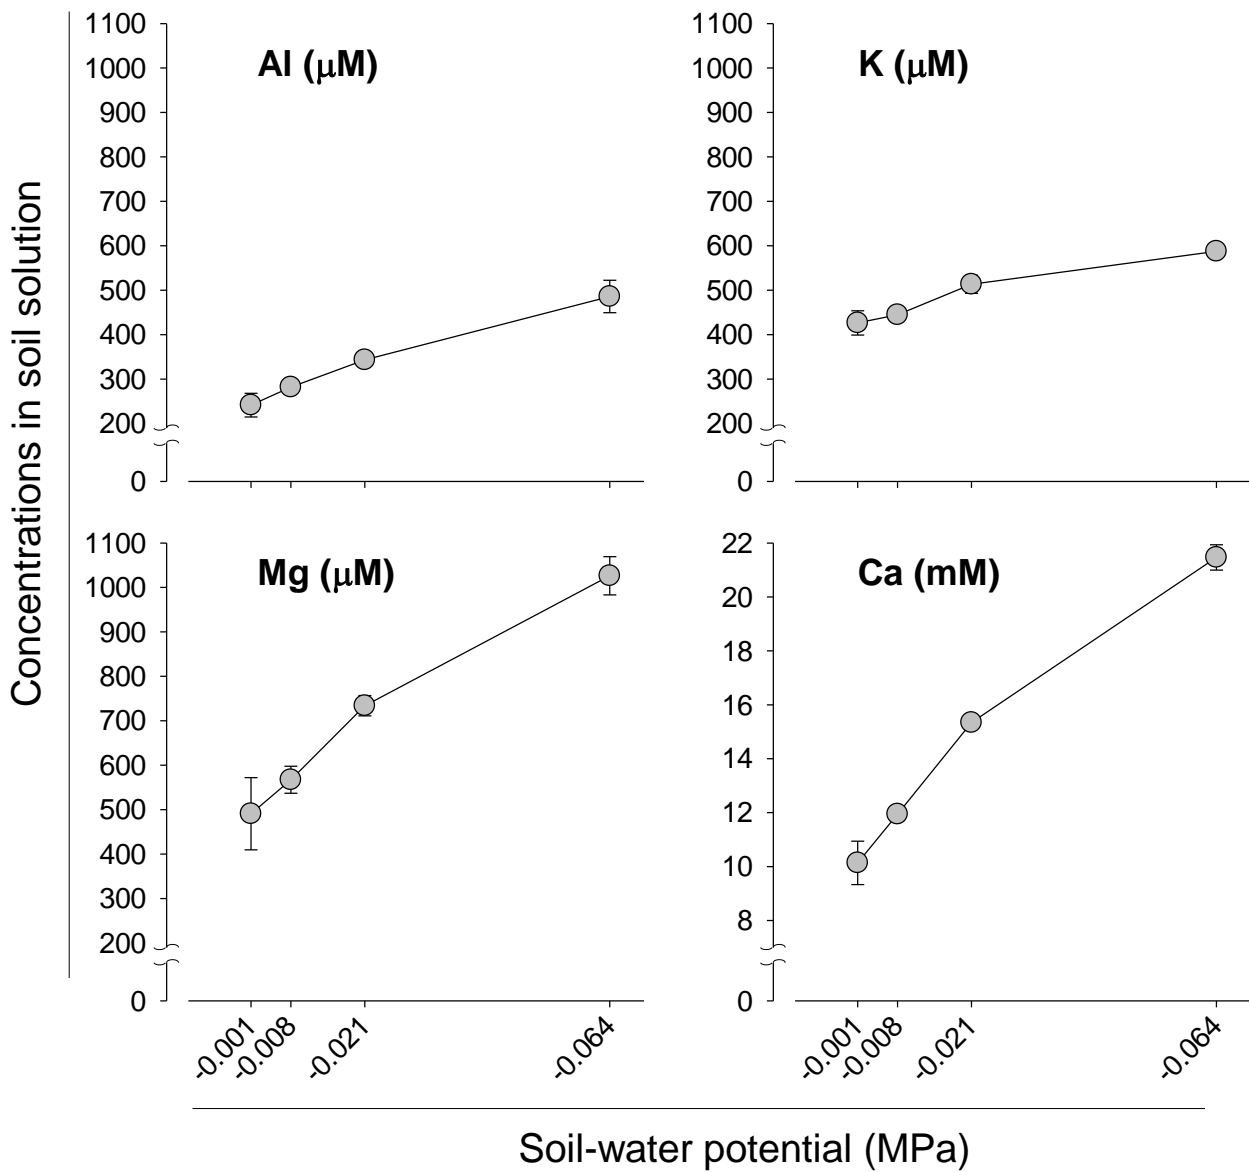

**Fig. S3.** The concentrations of Al, Ca, Mg and K in the soil solution under different levels of soil moisture. The soil solution from the incubated soil treated with 2 g Al was obtained by centrifugation (see Materials and Methods). Bars represent means  $\pm$ SD, n = 3.

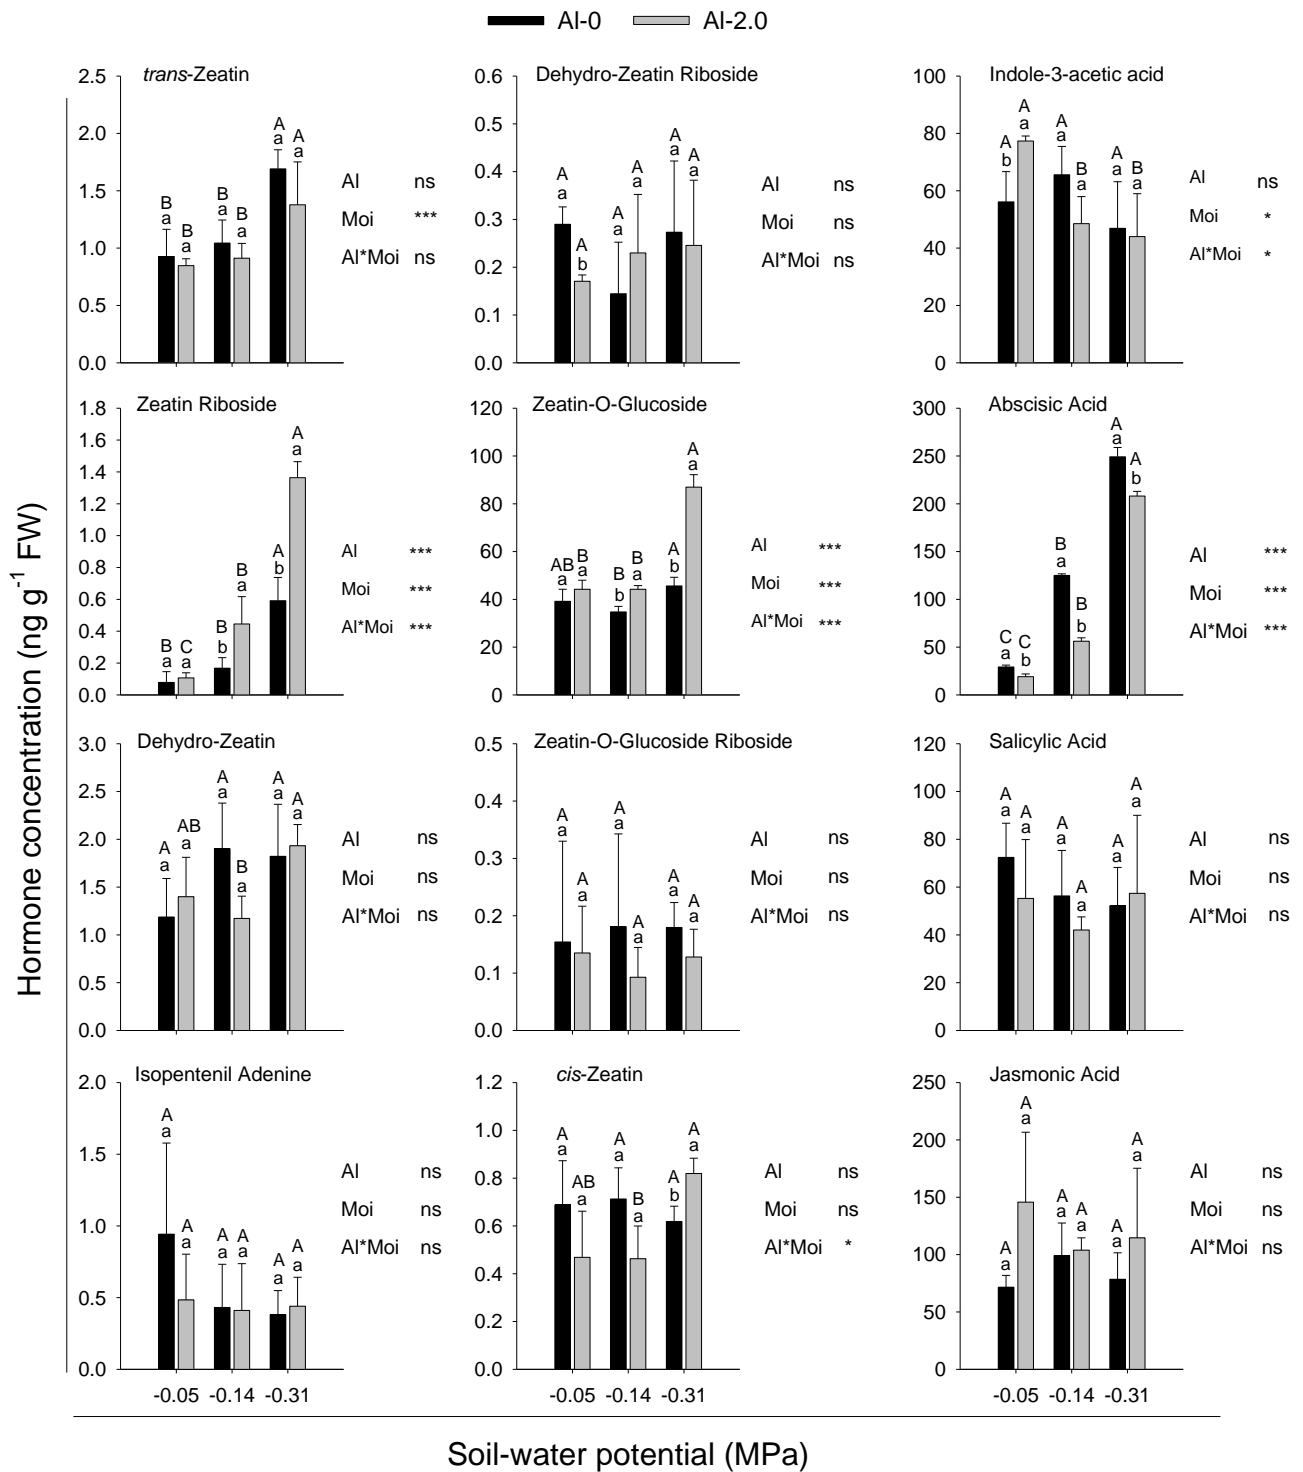

**Fig. S4.** Phytohormone concentrations in the 1-cm root tips of the common bean genotype VAX 1 as affected by soil moisture and Al supply ( $\text{g kg}^{-1}$  soil). Two-day-old seedlings were grown in soil for 24 h. Bars represent means  $\pm$  SD,  $n = 3$ . Means with different small and capital letters are significantly different at  $P < 0.05$  (Tukey test) for the comparison of Al treatments within soil moisture and comparison of soil-moisture treatments within Al treatments, respectively. For the ANOVA, \*, \*\*\* denote significant at  $P < 0.05$ ,  $P < 0.001$ , respectively. ns = not significant.

**Table S1.** List of genes and specific primer pairs used for quantitative gene expression analysis.

| Candidate genes                                                                    | Primer pairs (5'→3') <sup>a</sup> |                           | Amplicon size (bp) | TC/GB <sup>b</sup> | Accession No. |
|------------------------------------------------------------------------------------|-----------------------------------|---------------------------|--------------------|--------------------|---------------|
| <i>P5CS</i> (VuP5CS protein)                                                       | (+) GACAGTGCTGCTGTTTTCCA          | (-) AAACCCCTACTCCCACAGGA  | 128                |                    | TC14708       |
| <i>SUS</i> (Sucrose synthase 2)                                                    | (+) GCATGGCCTCATGAAAGAGT          | (-) GAAAGCAGGTGAACGAAAG   | 133                |                    | TC11609       |
| <i>AQP</i> (Aquaporin)                                                             | (+) CCACATCACCATCCTCACTG          | (-) ATTGCCAAACCTCCTGTGAC  | 102                |                    | TC14630       |
| <i>KS-DHN</i> (KS-type dehydrin SLTI629)                                           | (+) CATAGCAGTGAGGGCTGTGA          | (-) CAAAGCAGTGGGGTTACACA  | 157                |                    | TC23304       |
| <i>CYP701A</i> (Cytochrome P450 monooxygenase CYP701A16)                           | (+) GGATGCAACATGGACAAGAA          | (-) AACCTGCACACACCCTCTTC  | 136                |                    | TC18728       |
| <i>PvLEA18</i> (PvLEA-18)                                                          | (+) ACCAAAGACTGGTCGAGGTG          | (-) GGCAGTGTAGGAGGTGGTGT  | 141                |                    | TC17584       |
| <i>BEG</i> (Glucan endo-1, 3-beta-glucosidase precursor)                           | (+) ATGGAAGACTTGGCAACGAC          | (-) GCCTCTCAAAGCTCCAAGAA  | 122                |                    | TC11172       |
| <i>HRGP</i> (Hydroxyproline-rich glycoprotein)                                     | (+) CCTGTCTTGATGGTGAAGCA          | (-) TTCATTTGTTGCAGGCTGAC  | 114                |                    | CV543261      |
| <i>PRP</i> (Proline-rich protein)                                                  | (+) GCAAGTGTGTGCATTGCTT           | (-) TGGAAGCCAGAAGGAAGTGT  | 160                |                    | TC12228       |
| <i>LTP</i> (Protease inhibitor/seed storage/lipid transfer protein family protein) | (+) CCTCAGCAGCACAAGATGAG          | (-) TGACAGCAATCTGAGGGTTG  | 147                |                    | CV542382      |
| <i>XTHa</i> (Xyloglucan endotransglycosylase precursor)                            | (+) ATATGTCATCGGAGGGTCCA          | (-) TTGGTAGGGTCGAACCAAAG  | 151                |                    | TC12227       |
| <i>XTHb</i> (Xyloglucan endotransglycosylase/hydrolase)                            | (+) TTTGACCAACCCATGAAGGT          | (-) GCATTCACTGAGGCTTACACA | 153                |                    | CV542742      |
| <i>bZIP</i> (bZip transcription factor)                                            | (+) AAAGTCCACTTCCTCCTT            | (-) TCTCCTGTGCTTCCTTTCGT  | 127                |                    | TC17978       |
| <i>MYB</i> (MYB transcription factor MYB134)                                       | (+) CCGATTCCGACAAAATGAAC          | (-) GCATCAGGTGTGTTTCAGCTC | 136                |                    | TC13287       |
| <i>NCED</i> (9-cis-epoxycarotenoid dioxygenase)                                    | (+) GCTCGAAGCTTCCATCAAAC          | (-) ATCTGCAAGCATCCCTCAGT  | 143                |                    | AF190462      |
| <i>ZEP</i> (Zeaxanthin epoxidase)                                                  | (+) CCTCATCACAAAGGTGGGAGT         | (-) CCTTCTCTTTGCAGCCAAC   | 108                |                    | TC20513       |
| <i>AAO1</i> (Abscisic aldehyde oxidase 1)                                          | (+) TGCAACATCTTGGTCGAGAG          | (-) AAGTTCACAGCTCGCAGGTT  | 113                |                    | TC30901       |
| <i>AAO2</i> (Abscisic aldehyde oxidase 2)                                          | (+) TGCTGGGAGCACTACATCAG          | (-) TTGACAGAGCCATTTCCTC   | 117                |                    | TC25061       |
| <i>IPT1</i> (Isopentenyltransferase 1)                                             | (+) AAGGACAAGGTGGTGGTGAT          | (-) TTGCATTTTGTGCGAGTTGA  | 114                |                    | BW662125      |
| <i>IPT2</i> (Isopentenyltransferase 2)                                             | (+) TGCCAGGATCAAGATCAACA          | (-) GCTCTTAGCGAGAACGTGGT  | 160                |                    | CV543443      |
| <i>IPT3</i> (Isopentenyltransferase 3)                                             | (+) GTCAACTCAGACAAAATGCAA         | (-) ACAGTGCCAAGCAGATGATG  | 104                |                    | CA784528      |
| <i>CYP735A</i> (cytochrome P450 monooxygenase 735A)                                | (+) TCGTTGTGCTCAAGCAAGTC          | (-) GCAGAGTCTCCACCTCCATC  | 107                |                    | CV535867      |
| <i>ZOGT</i> (Zeatin O-glucosyltransferase)                                         | (+) GTTCTCCTCCTCCCAATCC           | (-) GCCATGAGGGAGTCATTGAT  | 155                |                    | AF116858      |
| <i>βGlc</i> (β-glucosidase)                                                        | (+) GGAGGTGTGAACAAGGAAGG          | (-) CTTGAGGAAGGTCCCAATGA  | 109                |                    | TC27431       |
| <i>CKX1</i> (Cytokinin oxidase/dehydrogenase 1)                                    | (+) GGAAGAAACCTTGTGGTGA           | (-) ACAAGCCTTTTGAACGCAAC  | 152                |                    | FE674332      |
| <i>CKX2</i> (Cytokinin oxidase/dehydrogenase 2)                                    | (+) CCAATGGTCTGATGGACTT           | (-) GCACTCTCCATGCTTCTCT   | 129                |                    | FE709123      |
| <i>MATE</i> (Citrate transporter family) (Eticha et al., 2010)                     | (+) CTGGATGCAGTTTCAAGAGAG         | (-) ACTCCAGCAGCTGCAAGTTC  | 138                |                    | CV535133      |
| <i>ACCO</i> (ACC-oxidase) (Eticha et al., 2010)                                    | (+) GAAGATGGCGCAAGAAGAAG          | (-) TGGAGCAAAGGTTCAAGGAG  | 105                |                    | AB002667      |
| <i>β-Tubulin</i> (Eticha et al., 2010)                                             | (+) CCGTTGTGGAGCCTTACAAT          | (-) GCTTGAGGGTCTGAAACAA   | 117                |                    | CV530631      |

<sup>a</sup> (+) and (-) indicate forward and reverse primers, respectively; <sup>b</sup>TC/GB, Tentative Consensus/GenBank®.
